# Supplementary material for: Fine‐scale structure among mesophotic populations of the great star coral Montastraea cavernosa revealed by SNP genotyping
Source: PubMed Central journal article supplement (PMC7319168; doi:10.1002/ece3.6340), 2020-05-20

Symbiodinium Breviolum Cladocopium Durusdinium

Proportion of Reads Aligned

1.00  
0.75  
0.50  
0.25  
0.00

KB1 KB10 KB11 KB12 KB13 KB15 KB16 KB17 KB18 KB19 KB20 KB22 KB23 KB7 DT1\_208 DT1\_210 DT1\_211 DT1\_212 DT1\_213 DT1\_215 DT1\_217 DT1\_218 DT1\_219 DT1\_221 DT1\_223 DT1\_225 DT1\_226 DT1\_227 DT1\_228 DT1\_229 DT1\_230 DT1\_231 DT3\_110 DT3\_112 DT3\_114 DT3\_117 DT3\_118 DT3\_121 DT3\_312 DT3\_316 DT3\_317 DT3\_319 DT3\_320 DT3\_321 DT3\_322 DT3\_323 DT3\_324 DT3\_325 DT3\_326 DT3\_328 PR1\_063 PR1\_064 PR1\_50 PR1\_52 PR1\_66 PR1\_67 PR1\_68 PR1\_70 PR1\_71 PR1\_73 PR1\_74 PR1\_75 PR1\_76 PR1\_78 PR2\_87 PR2\_88 PR2\_89 PR2\_90 PR2\_91 PR2\_92 PR2\_93

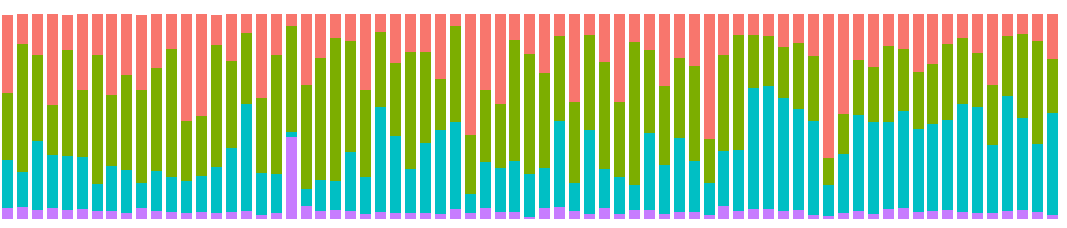

Supplement: ECE3-10-6009-s001.pdf [file ECE3-10-6009-s001.pdf]
